# Supplementary material for: Heteroleptic Ir(iii) complexes with varied π-conjugated diimine ligands: synthesis, tunable triplet states and nonlinear absorption properties
Source: Royal Society of Chemistry journal article supplement (doi:10.1039/d0dt01207f), 2020-01-01
Supplement: d0dt01207f1.pdf [file d0dt01207f1.pdf]

## Heteroleptic Ir(III) complexes with varied $\pi$ -conjugated diimine ligands: synthesis, tunable triplet states and nonlinear absorption properties

Senqiang Zhu, Lai Hu, Long Gu, Rui Liu\* and Hongjun Zhu\*

Department of Applied Chemistry, School of Chemistry and Molecular Engineering,  
Nanjing Tech University, Nanjing, 211816, China

\*Corresponding author.

Phone: +86-25-83172358. Fax: +86-25-83587428. E-mail: rui.liu@njtech.edu.cn (R. Liu), zhuhj@njtech.edu.cn (H. Zhu).

### 1. Photophysical properties of Ir-1–Ir-5

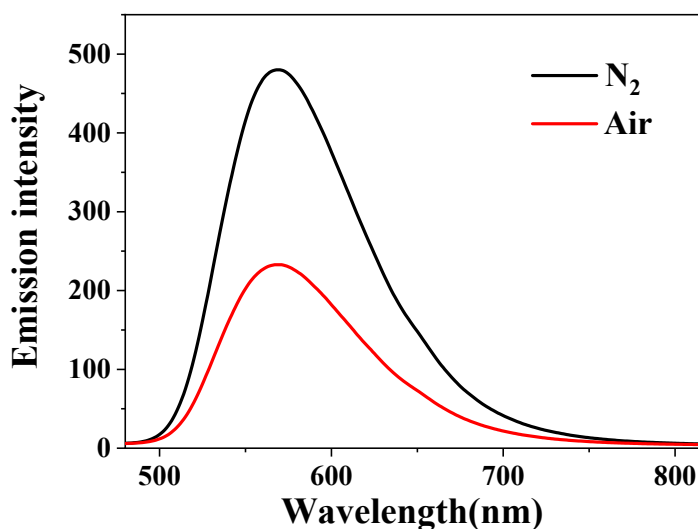

Fig. S1 Emission spectra of complex Ir-1 in air-saturated and degassed CH<sub>2</sub>Cl<sub>2</sub> solution.

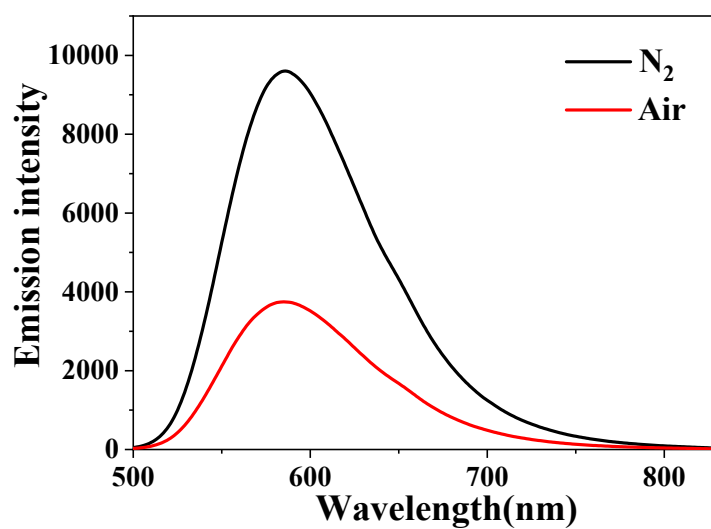

Fig. S2 Emission spectra of complex Ir-2 in air-saturated and degassed CH<sub>2</sub>Cl<sub>2</sub> solution

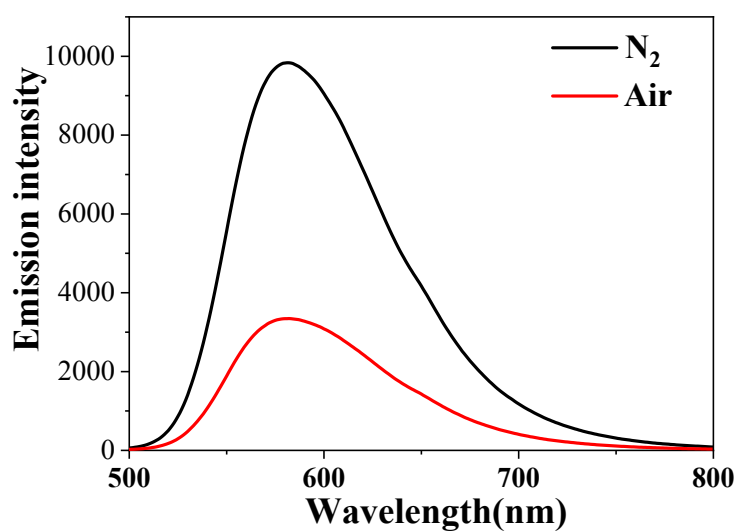

Fig. S3 Emission spectra of complex Ir-3 in air-saturated and degassed CH<sub>2</sub>Cl<sub>2</sub> solution

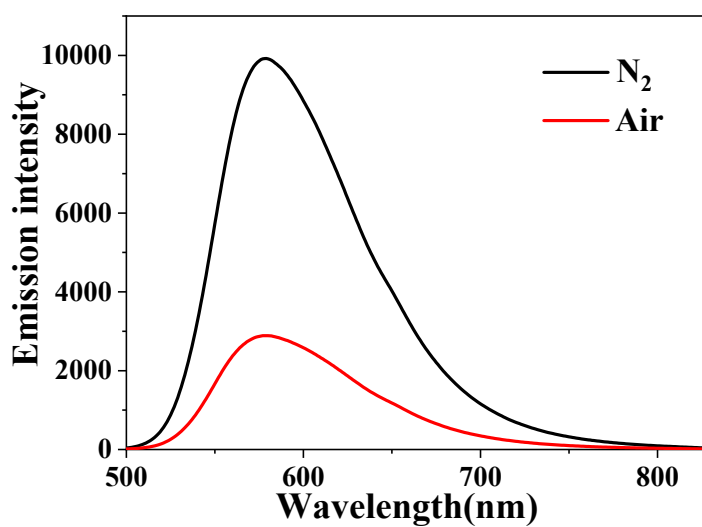

Fig. S4 Emission spectra of complex Ir-4 in air-saturated and degassed CH<sub>2</sub>Cl<sub>2</sub> solution

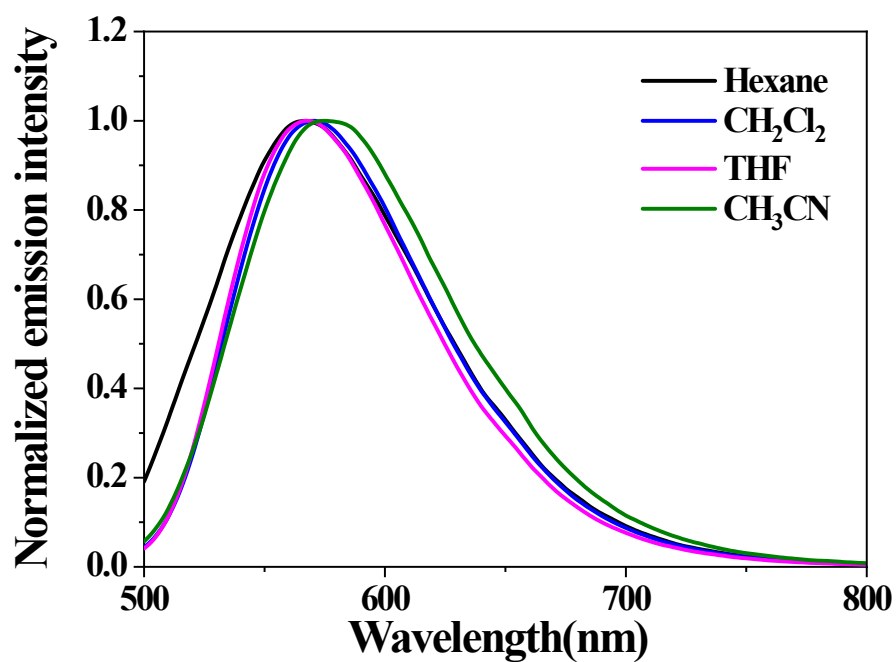

Fig. S5 Normalized emission spectra of Ir-1 in different solvents.

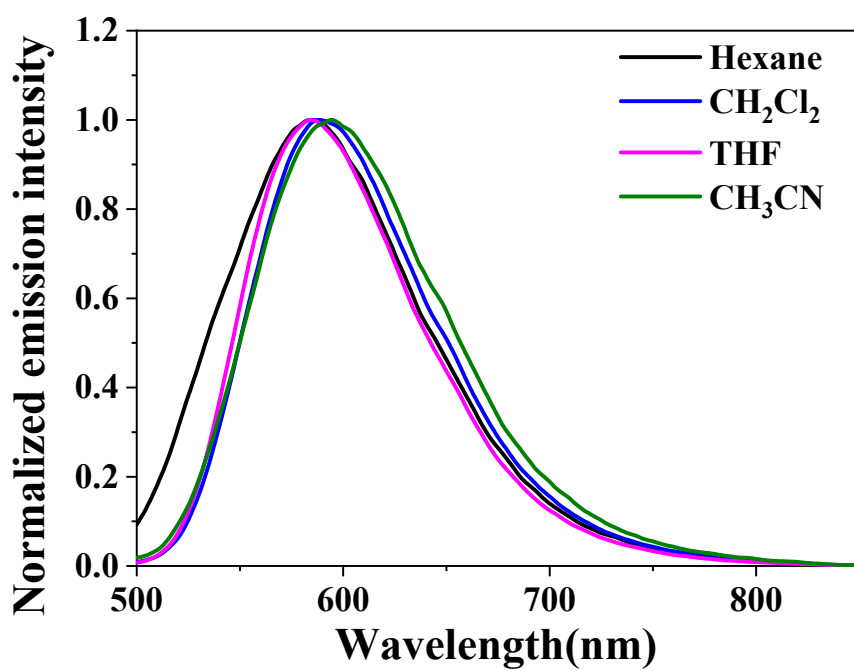

Fig. S6 Normalized emission spectra of Ir-2 in different solvents.

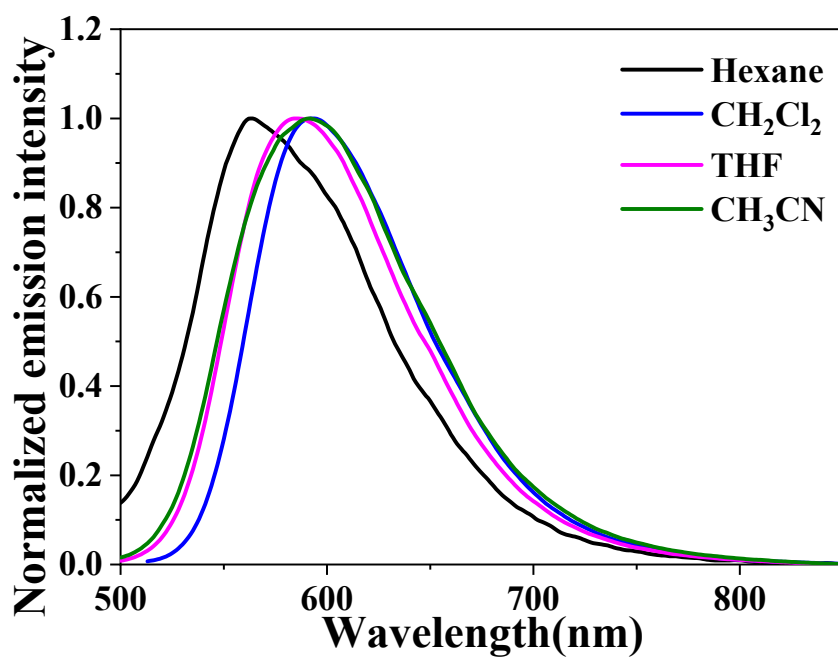

Fig. S7 Normalized emission spectra of Ir-3 in different solvents

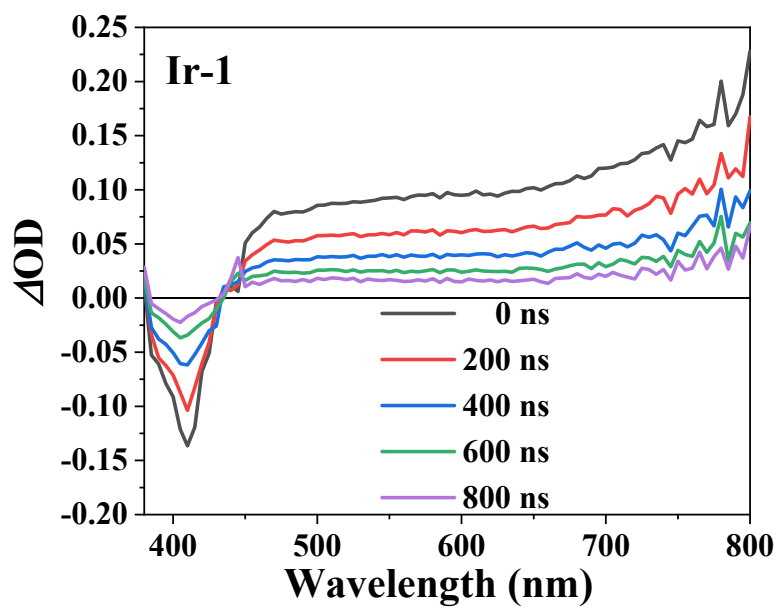

**Fig.S8** Time-resolved TA spectra of **Ir-1** in toluene without SE signals,  $c = 1 \times 10^{-5} \text{ mol L}^{-1}$ ,  $\lambda_{\text{ex}} = 355$  nm

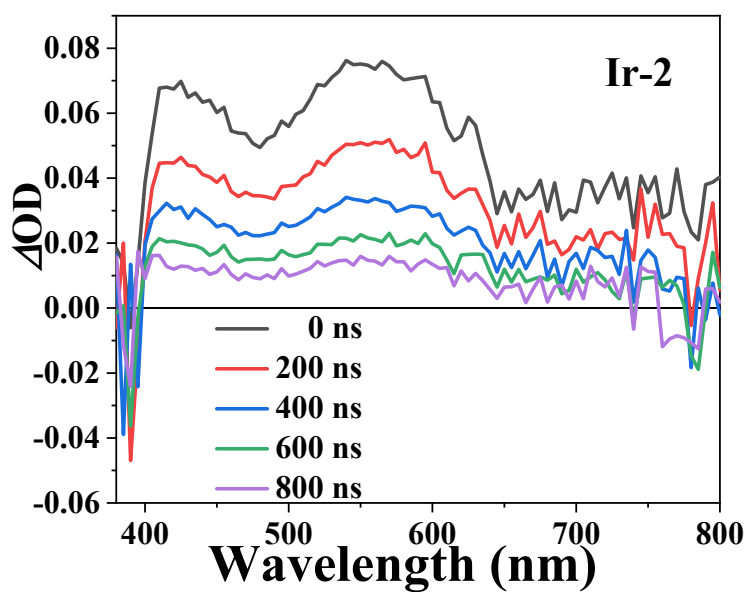

**Fig.S9** Time-resolved TA spectra of **Ir-2** in toluene without SE signals,  $c = 1 \times 10^{-5} \text{ mol L}^{-1}$ ,  $\lambda_{\text{ex}} = 355$  nm

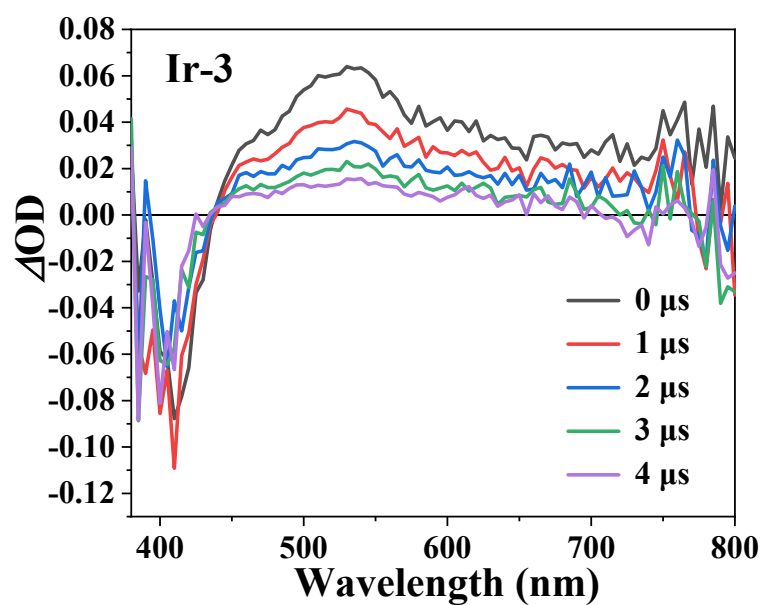

**Fig.S10** Time-resolved TA spectra of **Ir-3** in toluene without SE signals,  $c = 1 \times 10^{-5} \text{ mol L}^{-1}$ ,  $\lambda_{\text{ex}} = 355 \text{ nm}$

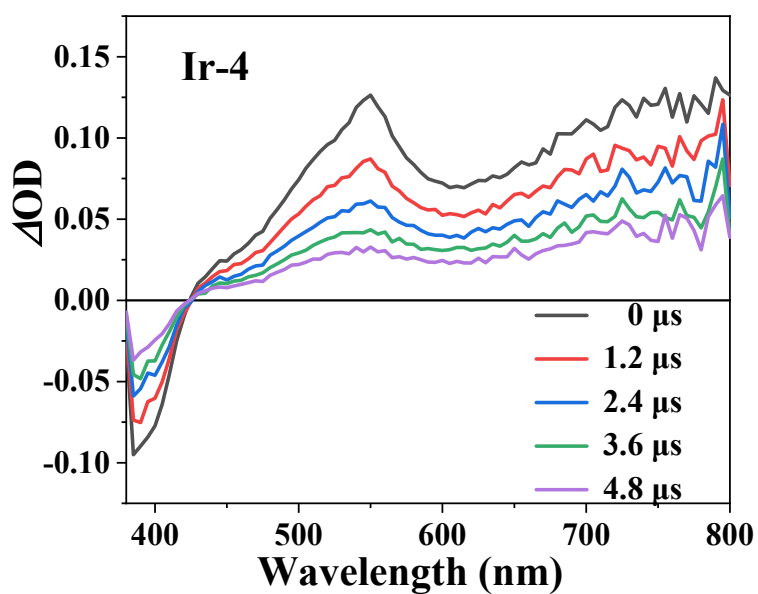

**Fig.S11** Time-resolved TA spectra of **Ir-4** in toluene without SE signals,  $c = 1 \times 10^{-5} \text{ mol L}^{-1}$ ,  $\lambda_{\text{ex}} = 355 \text{ nm}$

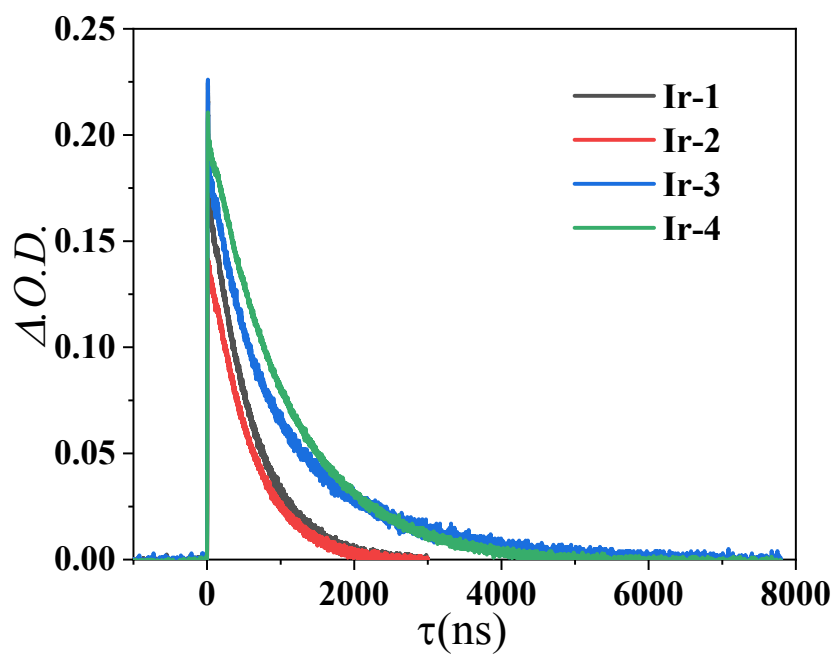

Fig. S12 Emission delay time of Ir-1–Ir-4

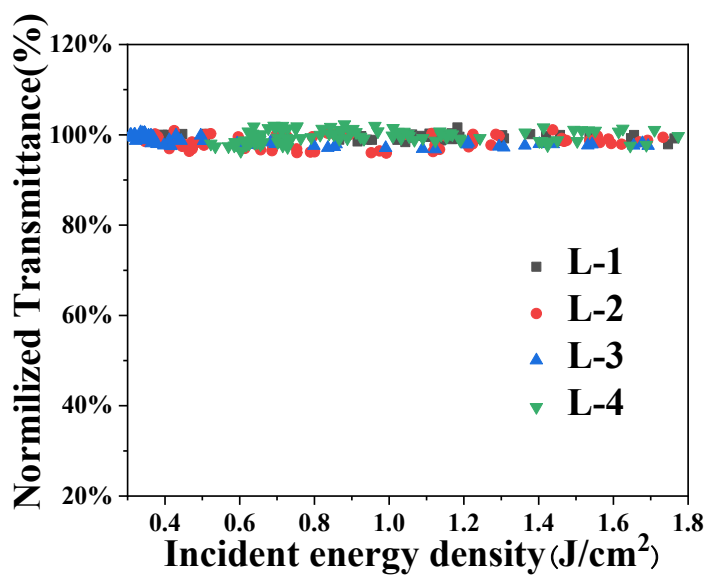

Fig. S13 Nonlinear transmission curves for L-1 – L-4 in toluene for 4.1 ns laser pulses at 532 nm. ( $c = 5 \times 10^{-4}$  mol/L)
